# Supplementary material for: Factors influencing the long-term sustainment of quality improvements made in addiction treatment facilities: a qualitative study
Source: Springer Nature journal article supplement (doi:10.1186/s13722-017-0093-x), 2017-10-26
Supplement: MOESM1 [file 15183216]

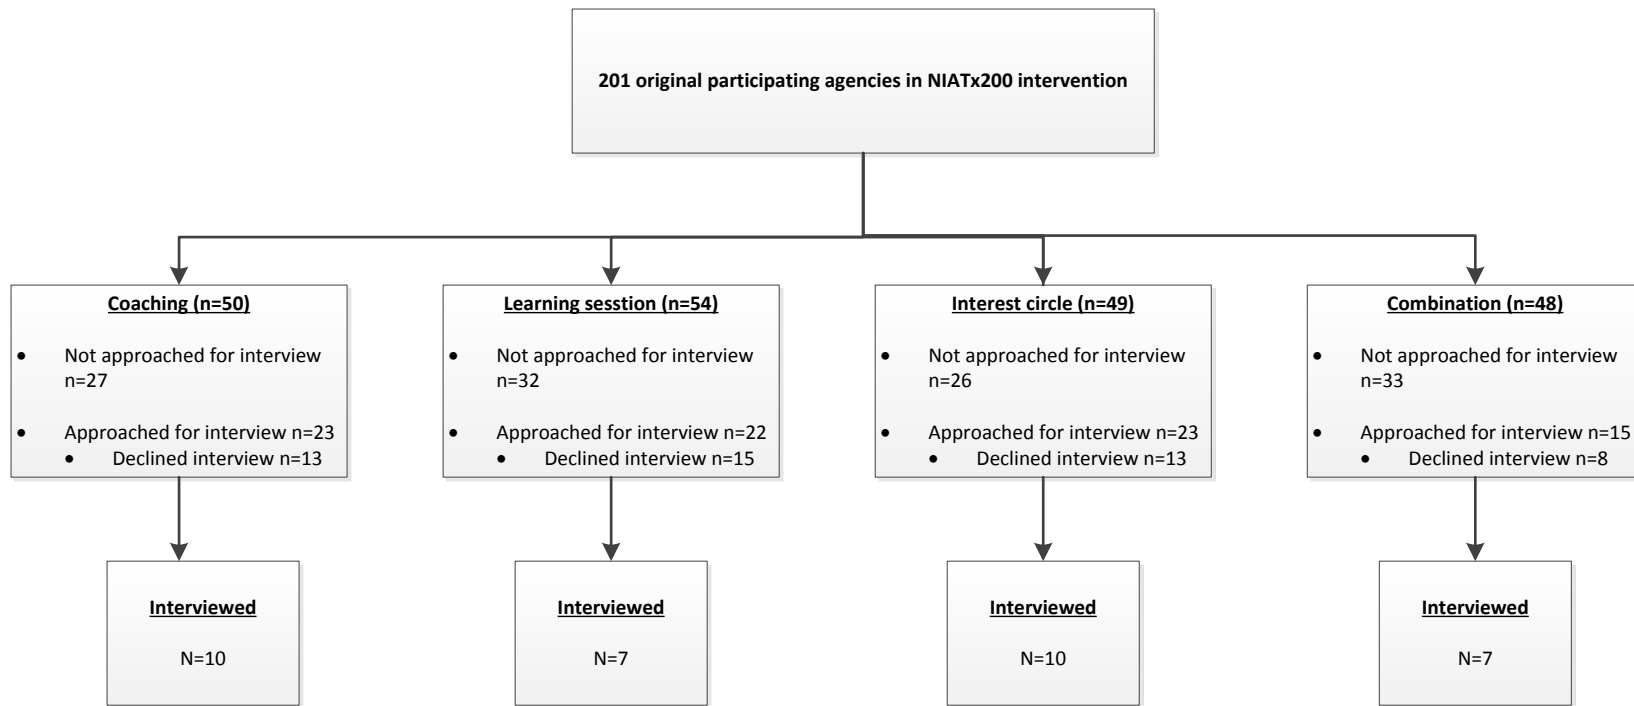

Note: we completed interviews with 33 individuals. One individual represents 2 participating clinics with one agency. Both clinics at the agency received the coaching intervention and are treated as one agency in the qualitative analyses.
